# Supplementary material for: ZYZ-803 Mitigates Endoplasmic Reticulum Stress-Related Necroptosis after Acute Myocardial Infarction through Downregulating the RIP3-CaMKII Signaling Pathway
Source: Hindawi journal article supplement (doi:10.1155/2019/6173685), 2019-06-02
Supplement: f1 [file 6173685.f1.pdf]

## Supplementary materials

TABLE S1. Data of parameters indicating cardiac function in each group especially supplemented with the sham+ZYZ-803 group, which showed no side effect of ZYZ-803 preconditioning to normal heart. FIGURE S1. Cytotoxicity test of ZYZ-803 to cardiomyocytes showed ZYZ-803 dosage more than 200 $\mu$ M emerged cardiac injury. Primary cardiomyocytes were treated with ZYZ-803 for 1 hour. FIGURE S2. Induction of cardiomyocyte death by tunicamycin (Tuni) treatment showed that Tuni treatment at 2 $\mu$ g/ml for 48h could remarkably induce cardiomyocyte death. FIGURE S3. Protection of ZYZ-803 against myocardial injury induced by oxygen-glucose deprivation (OGD). Primary cardiomyocytes with or without 1h ZYZ-803 pre-administration were treated with glucose-free medium and incubated in 95% N<sub>2</sub> and 5% CO<sub>2</sub> for 16 hours. (a) Assay of LDH release revealed reduce of ZYZ-803 to cardiomyocyte death induced by OGD. (b) Immunoblotting of protein expressions for ERS and necroptosis illustrated downregulation of ZYZ-803 to ERS and necroptosis induced by OGD. FIGURE S4. No significant change of heart rate in each experimental group after AMI and ZYZ-803 pretreatment. FIGURE S5. ZYZ-803 could downregulate cardiomyocyte apoptosis induced by Tuni. FIGURE S6. Influence of ZYZ-803 to RIP3 and CaMKII detected by immunohistochemistry.

TABLE S1: Data of parameters indicating cardiac function in each group especially supplemented with the sham+ZYZ-803 group, which showed no side effect of ZYZ-803 preconditioning to normal heart

| Measurement               | LVEF(%)     | LVFS(%)    | LVSD(mm)  | LVSV(ul)    |
|---------------------------|-------------|------------|-----------|-------------|
| Sham                      | 70.55±7.84  | 39.64±5.99 | 2.24±0.38 | 17.72±7.70  |
| Sham+ZYZ-803(8mg/kg/day)  | 66.63±4.47  | 36.29±3.23 | 2.43±0.36 | 21.41±8.26  |
| Model                     | 19.14±4.62  | 8.64±2.17  | 4.17±0.59 | 79.20±26.54 |
| Model+ZYZ-803(2mg/kg/day) | 21.94±8.48  | 10.08±4.23 | 4.11±0.41 | 75.35±17.86 |
| Model+ZYZ-803(4mg/kg/day) | 30.43±10.14 | 14.32±5.07 | 3.82±0.78 | 66.08±31.58 |
| Model+ZYZ-803(8mg/kg/day) | 44.55±7.22  | 22.62±2.56 | 3.09±0.41 | 41.07±13.85 |

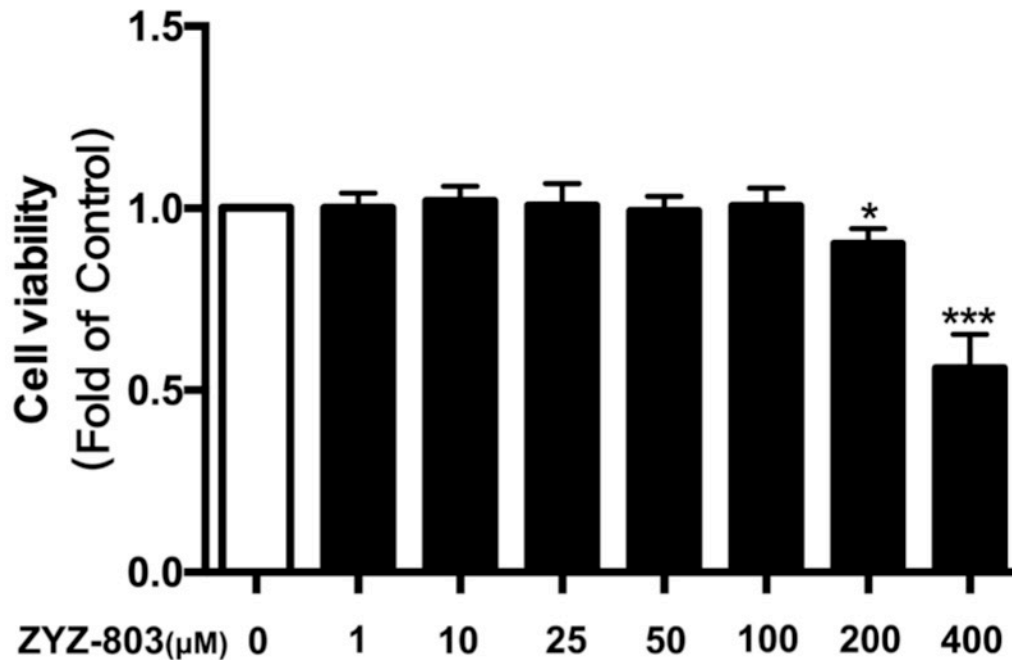

FIGURE S1: Cytotoxicity test of ZYZ-803 to cardiomyocytes showed ZYZ-803 dosage more than 200μM emerged cardiac injury. Primary cardiomyocytes were treated with ZYZ-803 for 1 hour. Data are defined as mean ± SEM, one-way ANOVA. Compared to group 0 μM, \* $P < 0.05$ , \*\*\* $P < 0.001$ .  $n = 3$  independent experiments.

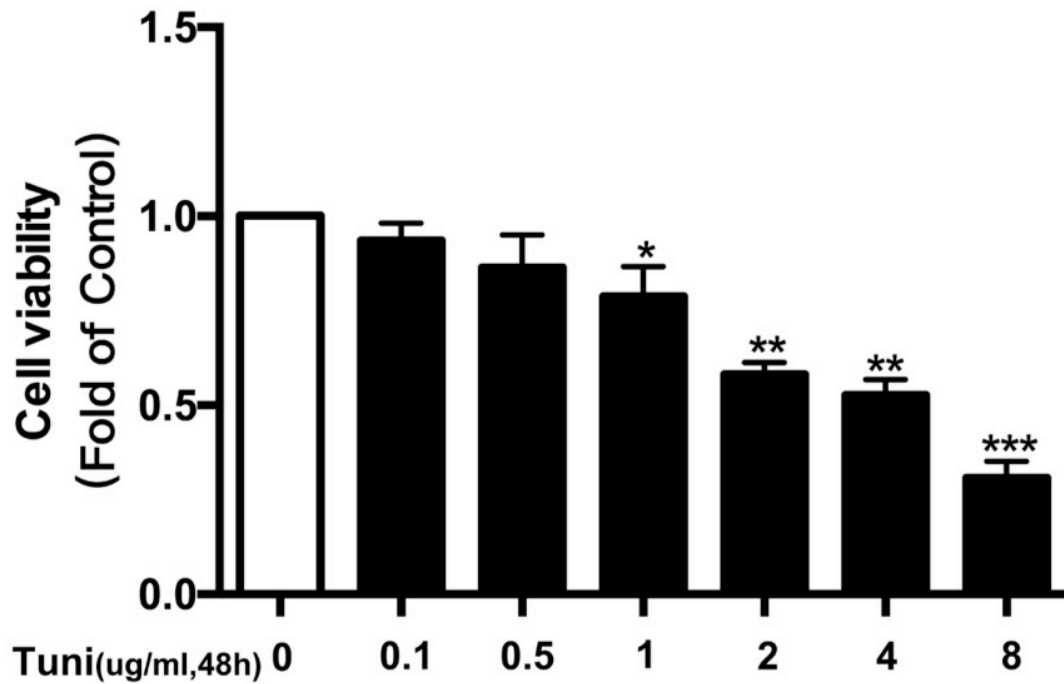

FIGURE S2: Induction of cardiomyocyte death by tunicamycin (Tuni) treatment showed that Tuni treatment at 2 $\mu$ g/ml for 48h could remarkably induce cardiomyocyte death. Data are defined as mean  $\pm$  SEM, one-way ANOVA. Compared to group 0 ug/ml, \* $P$ <0.05, \*\* $P$ <0.01, \*\*\* $P$ <0.001.  $n$ =3 independent experiments.

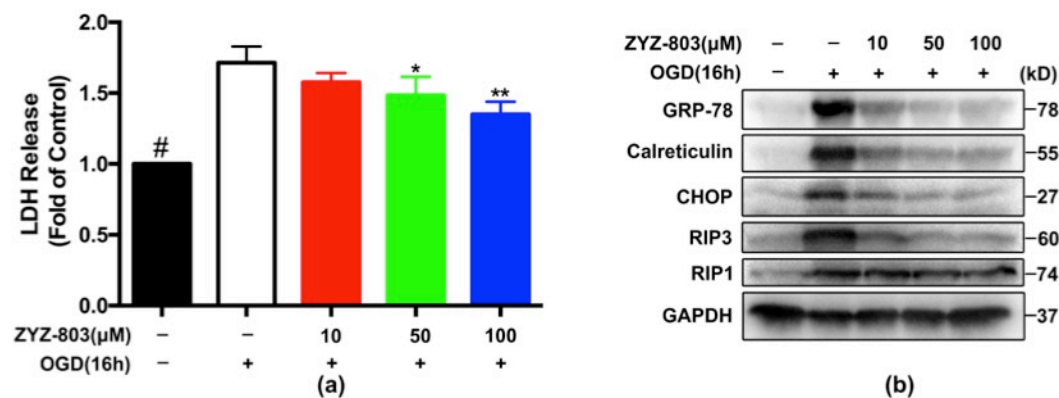

FIGURE S3: protection of ZYZ-803 against myocardial injury induced by oxygen-glucose deprivation (OGD). Primary cardiomyocytes with or without 1h ZYZ-803 pre-administration were treated with glucose-free medium and incubated in 95% N<sub>2</sub> and 5% CO<sub>2</sub> for 16 hours. (a) Assay of LDH release revealed reduce of ZYZ-803 to cardiomyocyte death induced by OGD. (b) Immunoblotting of protein expressions for ERS and necroptosis illustrated downregulation of ZYZ-803 to ERS and necroptosis

induced by OGD. Data are defined as mean  $\pm$  SEM, one-way ANOVA. Compared to OGD group, # $P$ <0.01, \* $P$ <0.05, \*\* $P$ <0.01. n=3 independent experiments.

#### Heart Rate Change after AMI and treatment of ZYZ-803

|                | Sham  | Model | ZYZ-803 (mg/kg/day) |       |       |
|----------------|-------|-------|---------------------|-------|-------|
|                |       |       | 2                   | 4     | 8     |
| Mean           | 514.8 | 505.3 | 530.0               | 516.5 | 527.8 |
| Std. Deviation | 58.16 | 62.19 | 34.70               | 76.97 | 54.79 |

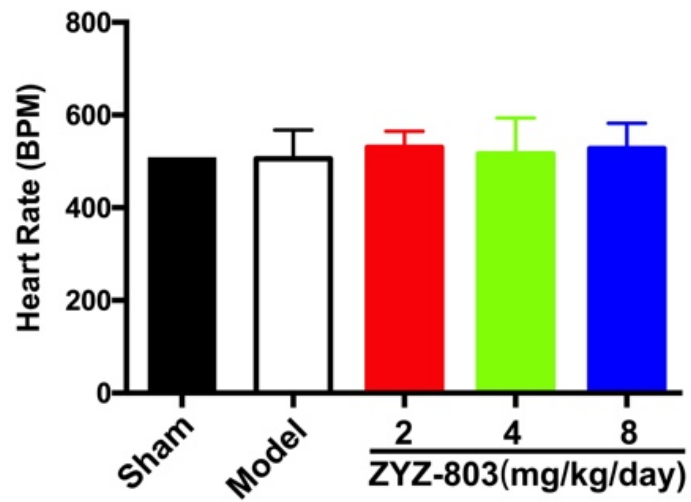

FIGURE S4: No significant change of heart rate in each experimental group.

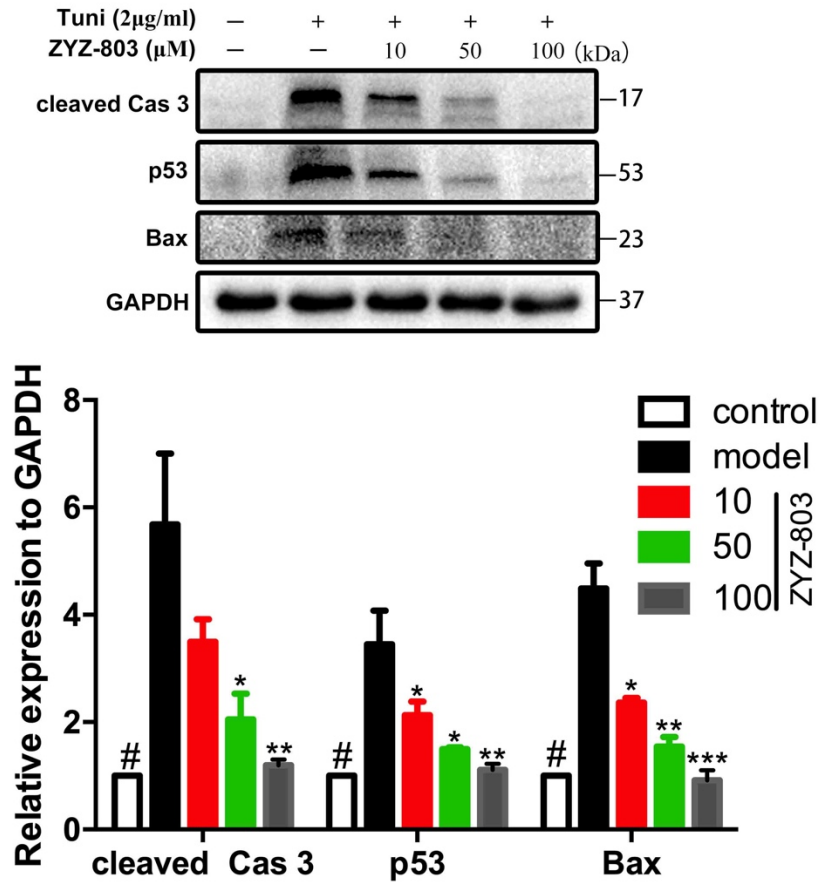

Figure S5. Effect of ZYZ-803 to apoptosis. Primary cardiomyocytes with or without 1h ZYZ-803 pre-administration were treated with 2μg/ml Tuni for 48 hours, and then apoptosis protein markers were detected by western blotting. Data are defined as mean ± SEM, one-way ANOVA. Compared to model group, \* $P < 0.05$ , \*\* $P < 0.01$ , \*\*\* $P < 0.001$ . n=3 independent experiments.

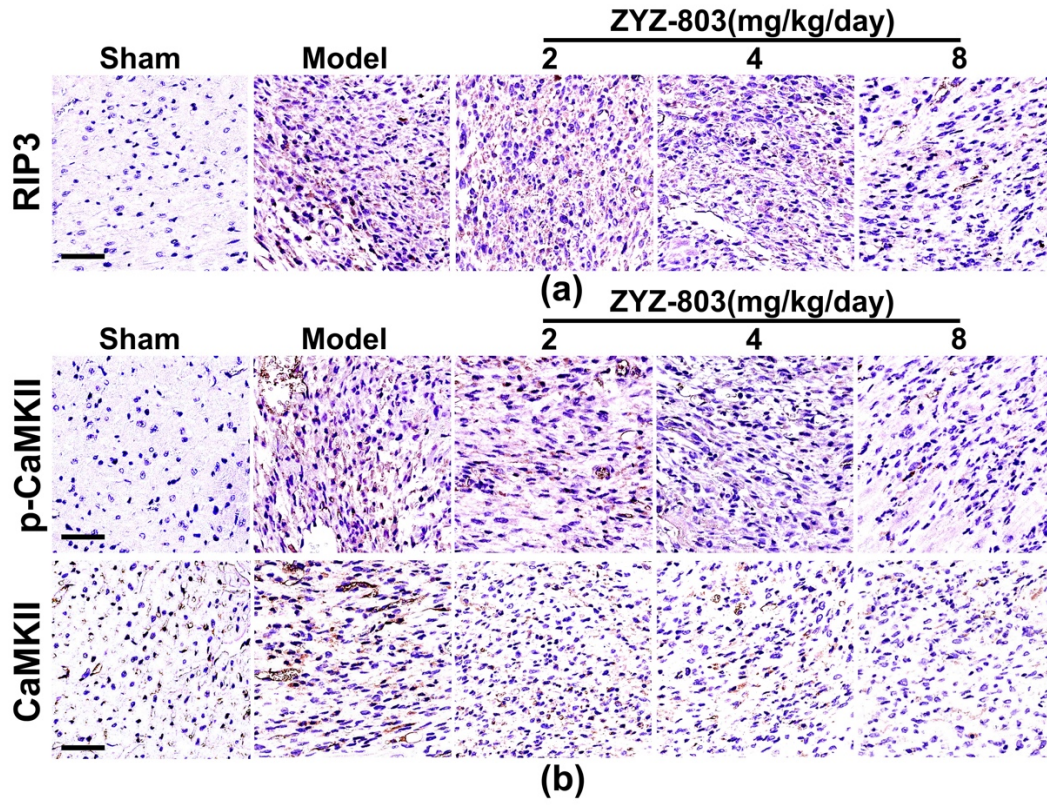

Figure S6. Influence of ZYZ-803 to RIP3 and CaMKII detected by immunohistochemistry. Scale bar (black), 100  $\mu$ m.
